# Supplementary material for: Synthesis and Physicochemical Properties of Acrylate Anion Based Ionic Liquids
Source: MDPI journal article supplement (doi:10.3390/polym14235148), 2022-11-26
Supplement: s1 [file s1]

ELECTRONIC SUPPLEMENTARY INFORMATION FOR

# Synthesis and physicochemical properties of acrylate anion based ionic liquids

Veronika S. Fedotova<sup>1</sup>, Maria P. Sokolova<sup>1,\*</sup>, Vitaliy K. Vorobiov<sup>1</sup>, Eugene V. Sivtsov<sup>2</sup>, Mauro C. C. Ribeiro<sup>3</sup>, Michael A. Smirnov<sup>1,4,\*</sup>

<sup>1</sup> Institute of Macromolecular Compounds, Russian Academy of Sciences, V.O. Bolshoi Pr. 31, 199004 St. Petersburg, Russia

<sup>2</sup> Saint Petersburg State Institute of Technology, Moskovsky prospekt 24-26/49, 190013 St. Petersburg, Russia

<sup>3</sup> Laboratório de Espectroscopia Molecular, Departamento de Química Fundamental, Instituto de Química, Universidade de São Paulo, 05513-970 São Paulo, Brazil

<sup>4</sup> Institute of Chemistry, Saint Petersburg State University, Universitetsky pr. 26, Peterhof, 198504 St. Petersburg.

\* Correspondence: pmarip@mail.ru (M.P.S.); smirnov\_michael@mail.ru (M.A.S.)

## 1. Rheological properties of acrylate-based mILs with BC

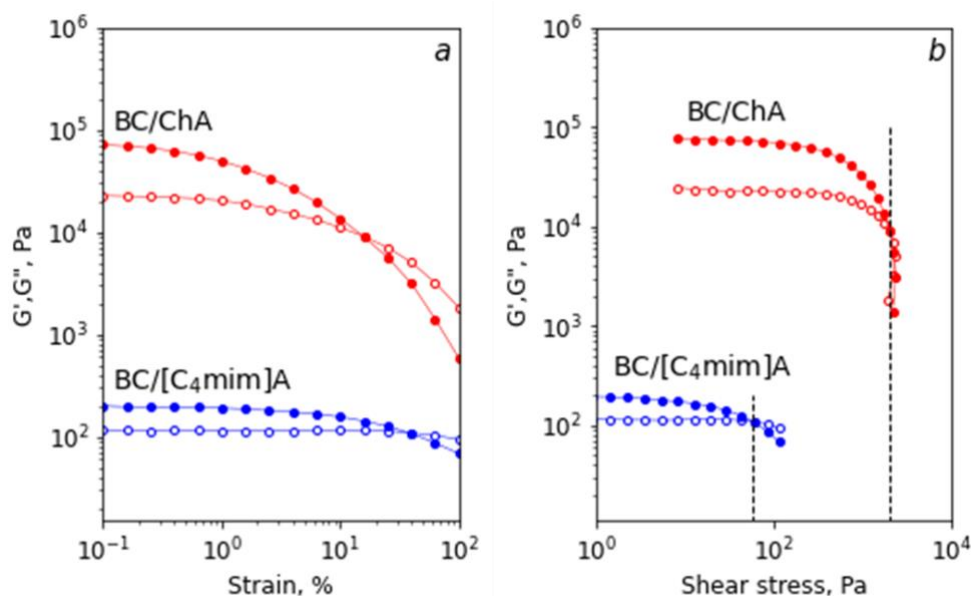

**Figure S1.** Storage ( $G'$ , filled symbols) and loss ( $G''$ , hollow symbols) moduli as a function of strain (a) and shear stress (b) for BC/ChA and BC/[C4mim]A dispersions.

## 2. Structural study of mILs by $^1\text{H}$ NMR spectroscopy

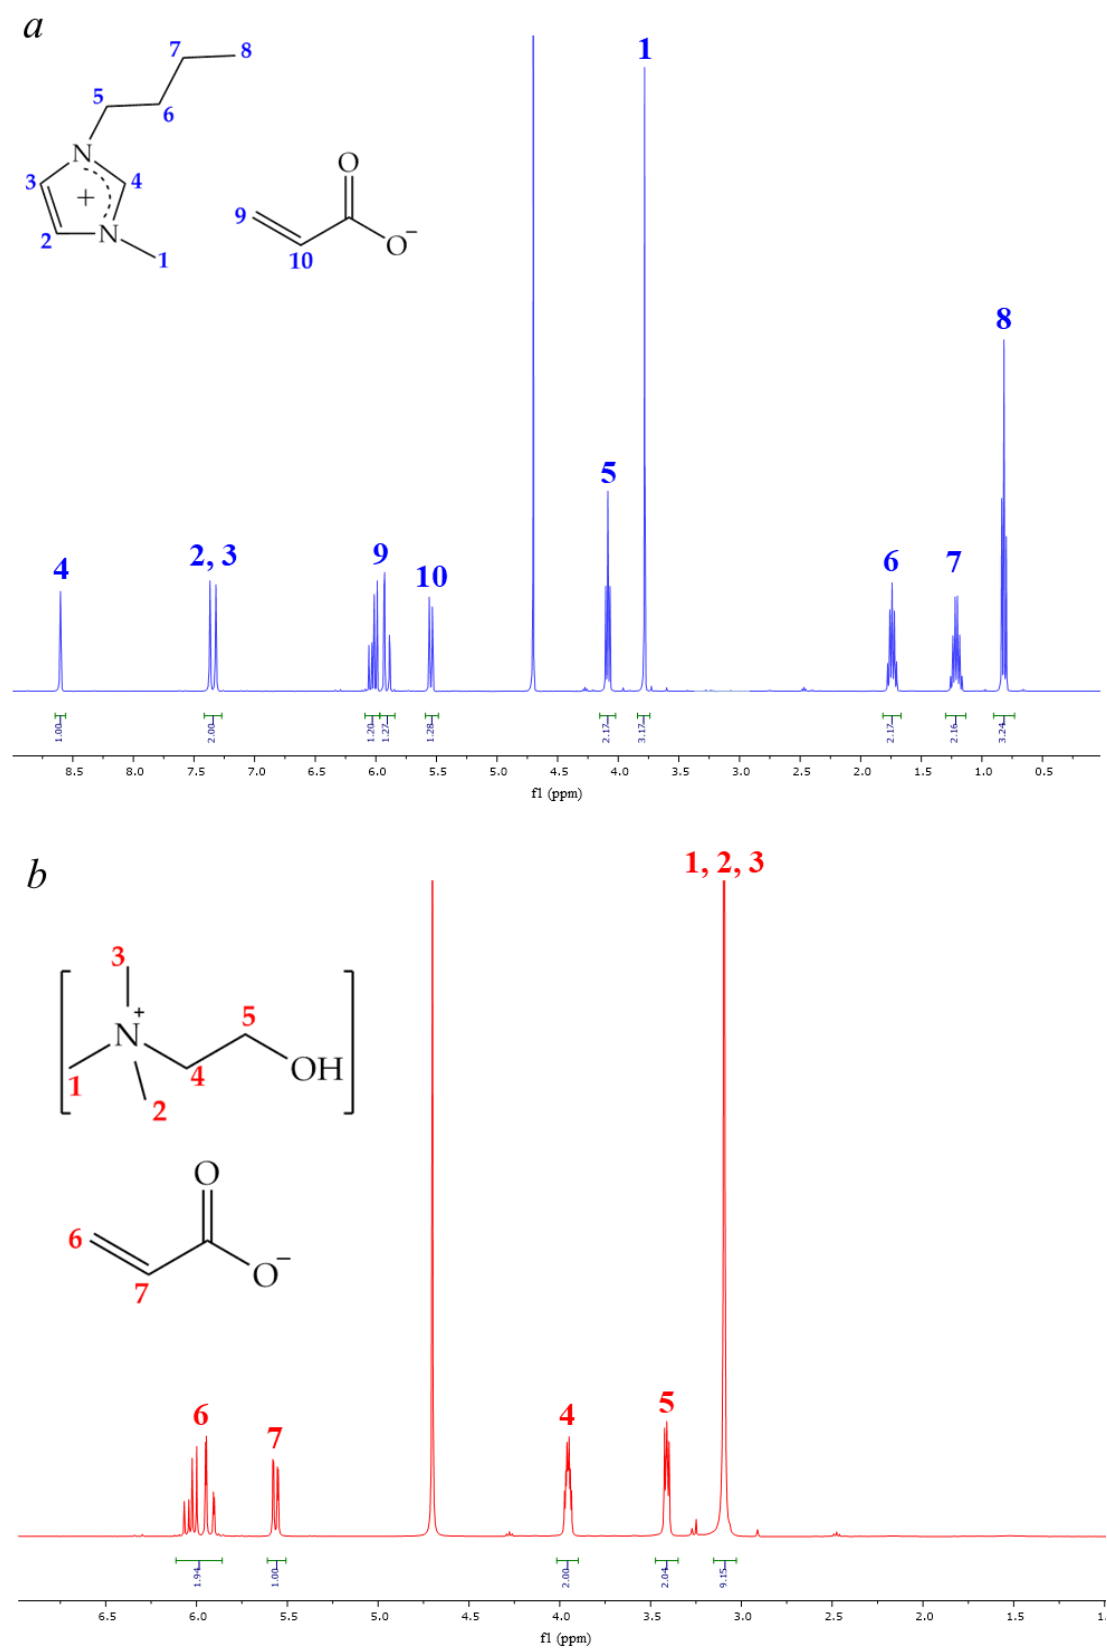

**Figure S2.**  $^1\text{H}$  NMR spectra of the obtained mILs: [C4mim]A (a) and ChA (b);  $\text{D}_2\text{O}$  was used as a solvent.

### 3. Structural study of mILs by $^{13}\text{C}$ NMR spectroscopy

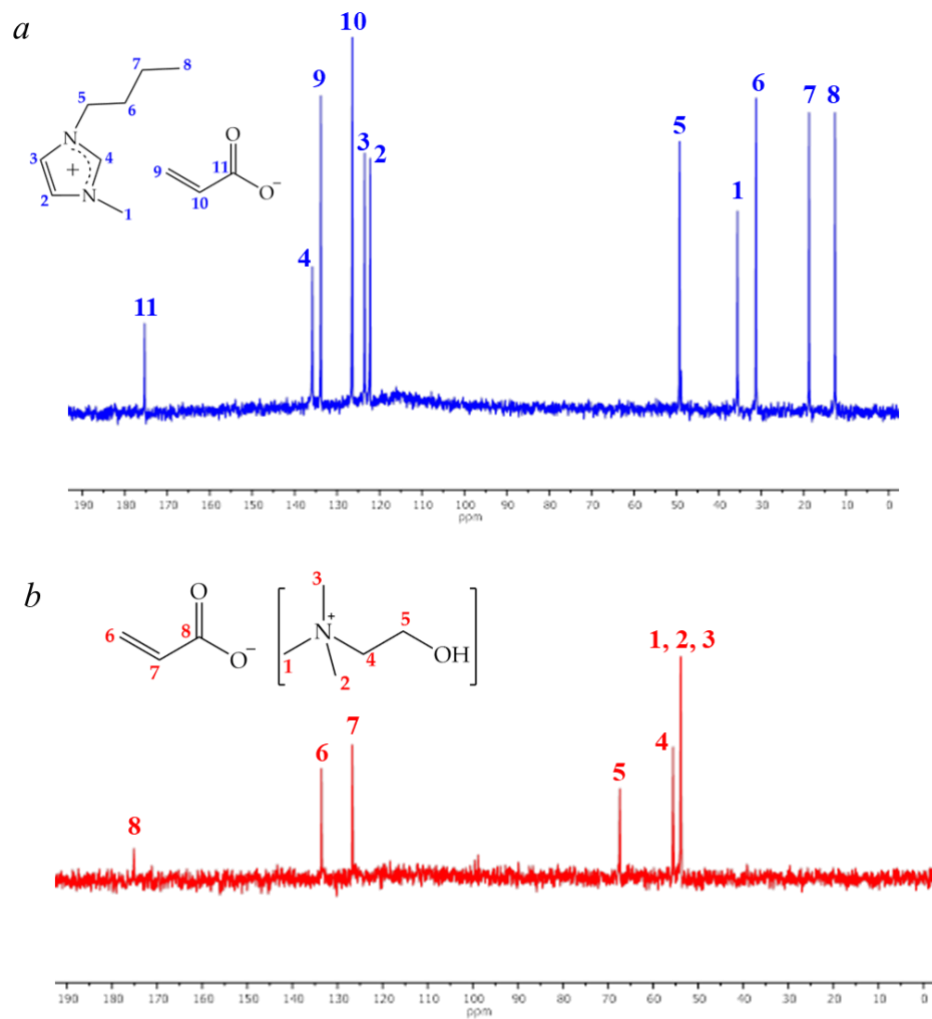

**Figure S3.**  $^{13}\text{C}$  NMR spectra of the obtained mILs: [C<sub>4</sub>mim]A (**a**) and ChA (**b**);  $\text{D}_2\text{O}$  was used as a solvent.

#### 4. Study of mILs by mass spectrometry

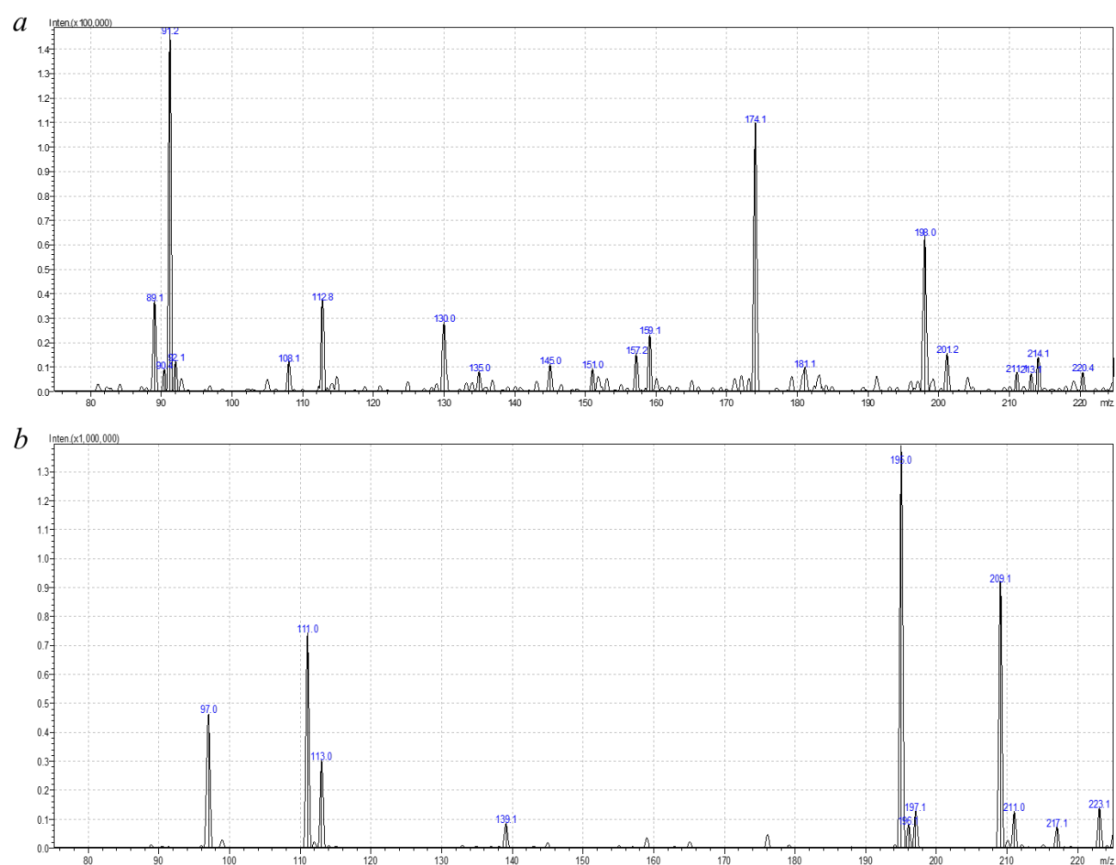

**Figure S4.** Electrospray mass spectra of [C<sub>4</sub>mim]A (**a**) and ChA (**b**) in negative mode.
